# Supplementary material for: Preoperative Status of Gut Microbiota Predicts Postoperative Delirium in Patients With Gastric Cancer
Source: PubMed Central journal article supplement (PMC8929925; doi:10.3389/fpsyt.2022.852269), 2022-03-03

**Supplementary Figure 1.**  $\alpha$ -diversity analyses of data. (A) Observed operational taxonomic unit analysis; (B) Good coverage analysis; (C) Chaos analysis; (D) Shannon analysis; (E) Simpson analysis.

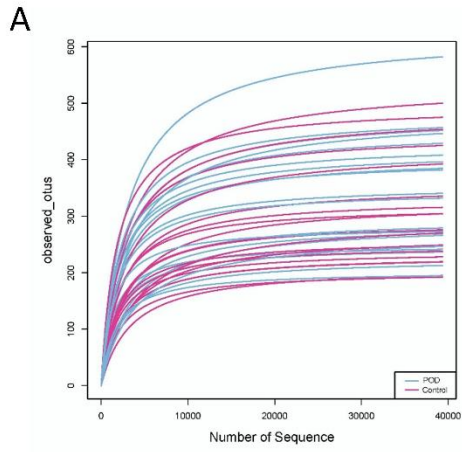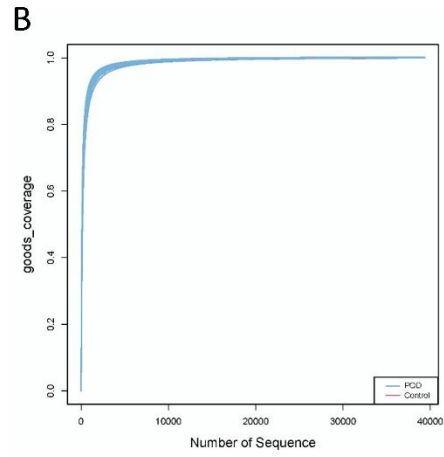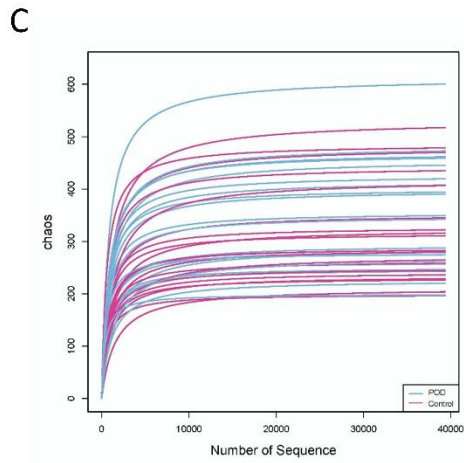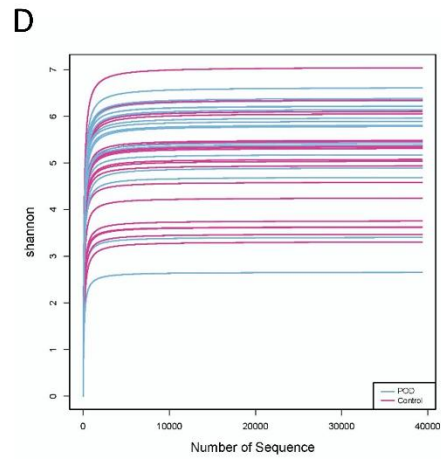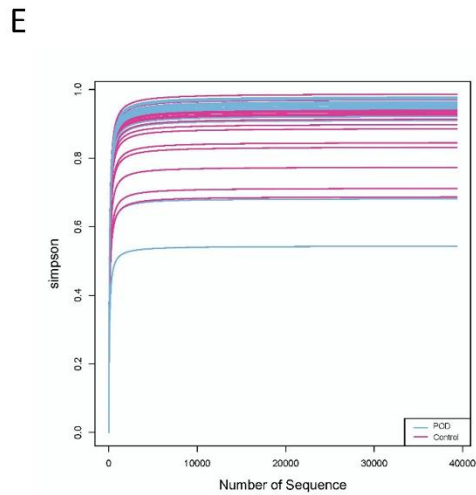

Supplement: Presentation_1.pdf [file Presentation_1.pdf]
